# Supplementary material
Source: PubMed Central journal article supplement (PMC8608714)
Supplement: NIHMS1723148-supplement-1.pdf [file NIHMS1723148-supplement-1.pdf]

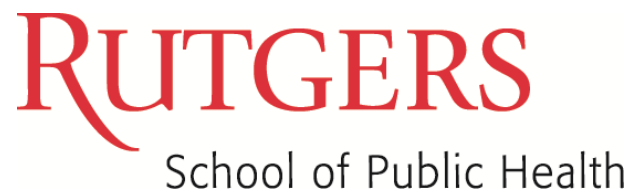

# **Physician Attitudes and Communication of Tobacco Use and Treatment**

## **Instructions**

Thank you for taking time to complete this important survey. Your opinions and experiences are extremely valuable and will help us to conduct a comprehensive assessment of tobacco dependence treatment. The questions primarily address smoking cessation and tobacco use, including emerging products like electronic cigarettes and should take less than 15 minutes to complete.

**1. Do you have direct health care contact with adult patients in your outpatient practice?**

<sub>1</sub> Yes

<sub>2</sub> No → Please  here and return survey in the self-addressed stamped envelope.

**2. Please indicate how frequently you do the following in your outpatient practice by circling your choice.**

|                                                                                                              | Never | Rarely | Some of<br>the Time | Most of<br>the Time | Always |
|--------------------------------------------------------------------------------------------------------------|-------|--------|---------------------|---------------------|--------|
| Ask your patients if they smoke                                                                              | 1     | 2      | 3                   | 4                   | 5      |
| Advise smokers to stop smoking                                                                               | 1     | 2      | 3                   | 4                   | 5      |
| Ask smokers if they are interested in quitting                                                               | 1     | 2      | 3                   | 4                   | 5      |
| Encourage smokers to set a quit date                                                                         | 1     | 2      | 3                   | 4                   | 5      |
| Discuss medication options, such as nicotine replacement,<br>Zyban® (Bupropion SR) or Chantix® (Varenicline) | 1     | 2      | 3                   | 4                   | 5      |
| Refer for smoking cessation treatment                                                                        | 1     | 2      | 3                   | 4                   | 5      |
| Follow-up with a letter, call, or visit about their smoking                                                  | 1     | 2      | 3                   | 4                   | 5      |

**3. Please indicate the extent to which you agree or disagree that the following are barriers for you in providing smoking cessation treatment by circling your choice.**

|                                                                                      | Strongly<br>Agree | Somewhat<br>Agree | Somewhat<br>Disagree | Strongly<br>Disagree |
|--------------------------------------------------------------------------------------|-------------------|-------------------|----------------------|----------------------|
| Lack of time during patient visit                                                    | 1                 | 2                 | 3                    | 4                    |
| Patient's resistance to cessation messages                                           | 1                 | 2                 | 3                    | 4                    |
| No or limited provider reimbursement                                                 | 1                 | 2                 | 3                    | 4                    |
| Lack of community resources for referral                                             | 1                 | 2                 | 3                    | 4                    |
| Cost of cessation treatment to the patient (e.g. medication,<br>counseling programs) | 1                 | 2                 | 3                    | 4                    |
| Lack of training or experience in smoking cessation                                  | 1                 | 2                 | 3                    | 4                    |
| Competing priorities in the visit (e.g. acute illness)                               | 1                 | 2                 | 3                    | 4                    |
| Patient's disinterest in pharmacotherapy                                             | 1                 | 2                 | 3                    | 4                    |

4. Please indicate how effective you believe the following methods are in helping smokers quit cigarettes by circling your choice.

|                                                       | Not at all Effective | Minimally Effective | Somewhat Effective | Very Effective |
|-------------------------------------------------------|----------------------|---------------------|--------------------|----------------|
| Nicotine Patch                                        | 1                    | 2                   | 3                  | 4              |
| Nicotine Gum                                          | 1                    | 2                   | 3                  | 4              |
| Nicotine Lozenge                                      | 1                    | 2                   | 3                  | 4              |
| Nicotine Oral Inhaler (Nicotrol®)                     | 1                    | 2                   | 3                  | 4              |
| Nicotine Nasal Spray (Nicotrol®)                      | 1                    | 2                   | 3                  | 4              |
| Zyban® (Bupropion SR)                                 | 1                    | 2                   | 3                  | 4              |
| Chantix® (Varenicline)                                | 1                    | 2                   | 3                  | 4              |
| Electronic cigarettes (e-cigarettes)                  | 1                    | 2                   | 3                  | 4              |
| Combination of two or more cessation medications      | 1                    | 2                   | 3                  | 4              |
| E-cigarettes in combination with cessation medication | 1                    | 2                   | 3                  | 4              |
| Cutting back on number of cigarettes smoked per day   | 1                    | 2                   | 3                  | 4              |

5. Please indicate the extent to which you agree or disagree that nicotine directly contributes to the development of the following health problems by circling your choice.

|                        | Strongly Agree | Somewhat Agree | Somewhat Disagree | Strongly Disagree |
|------------------------|----------------|----------------|-------------------|-------------------|
| Birth defects          | 1              | 2              | 3                 | 4                 |
| Cardiovascular disease | 1              | 2              | 3                 | 4                 |
| Cancer                 | 1              | 2              | 3                 | 4                 |
| Depression             | 1              | 2              | 3                 | 4                 |
| COPD                   | 1              | 2              | 3                 | 4                 |

6. Have your patients ever asked you about e-cigarettes?

- <sub>1</sub> Yes  
<sub>2</sub> No

If YES →

6.a. Have any of your patients asked you about e-cigarettes in the past 30 days?

- <sub>1</sub> Yes  
<sub>2</sub> No

7. Have you ever recommended to a smoker they should switch to e-cigarettes?

- <sub>1</sub> Yes  
<sub>2</sub> No

If YES →

7.a. Have you recommended to a smoker they should switch to e-cigarettes in the past 30 days?

- <sub>1</sub> Yes  
<sub>2</sub> No

***For the next two questions, please read each scenario and indicate which message or messages MOST CLOSELY describes what you would communicate to the patient.***

**8. A 29 year old female cigarette smoker, who smokes 10 cigarettes per day, and has never tried any cessation medications or behavioral counseling for tobacco use, asks you about e-cigarettes to help them quit smoking. In addition to advising her of the importance of quitting, you would do which of the following: Please check all that apply.**

- <sub>1</sub> Encourage her to try e-cigarettes to transition off of smoking cigarettes
- <sub>2</sub> Communicate that you prefer her to use FDA-approved pharmacotherapy rather than e-cigarettes to help them stop smoking
- <sub>3</sub> Communicate that e-cigarettes are not effective for cessation and discourage their use
- <sub>4</sub> Communicate that e-cigarettes are harmful and discourage their use

**9. A 65 year old male cigarette smoker, who smokes 40 cigarettes per day, and has had multiple unsuccessful quit attempts with various FDA-approved cessation medications with behavioral counseling for tobacco use, asks you about e-cigarettes to help them quit smoking. In addition to advising him of the importance of quitting, you are likely to do which of the following: Please check all that apply.**

- <sub>1</sub> Encourage him to try e-cigarettes to transition off of smoking cigarettes
- <sub>2</sub> Communicate that you prefer him to use FDA-approved pharmacotherapy rather than e-cigarettes to help them stop smoking
- <sub>3</sub> Communicate that e-cigarettes are not effective for cessation and to discourage their use
- <sub>4</sub> Communicate that e-cigarettes are harmful and discourage their use

**10. Harm reduction is being debated in the context of cigarette smoking with some people believing smokers will benefit from switching to non-combustible products while others believe the only approach is complete cessation from all tobacco products. Which of the following best represents your beliefs?**

- <sub>1</sub> All forms of tobacco are equally harmful and cessation from all tobacco is the best approach
- <sub>2</sub> Cigarettes are the most dangerous tobacco product, getting smokers to stop smoking cigarettes should be the goal, even if it means switching to less harmful forms of tobacco

**11. Please indicate the extent to which you agree or disagree with the following statements about e-cigarettes by circling your choice.**

|                                                                                        | Strongly Agree | Somewhat Agree | Somewhat Disagree | Strongly Disagree |
|----------------------------------------------------------------------------------------|----------------|----------------|-------------------|-------------------|
| E-cigarettes should be available by prescription only                                  | 1              | 2              | 3                 | 4                 |
| Flavors in e-cigarettes should be banned                                               | 1              | 2              | 3                 | 4                 |
| E-cigarette use should be prohibited in public places                                  | 1              | 2              | 3                 | 4                 |
| E-cigarettes should have warnings that they are as harmful as cigarettes               | 1              | 2              | 3                 | 4                 |
| E-cigarette use reduces the risk of tobacco-caused disease                             | 1              | 2              | 3                 | 4                 |
| E-cigarettes help people quit smoking cigarettes                                       | 1              | 2              | 3                 | 4                 |
| E-cigarettes are safer than regular cigarettes                                         | 1              | 2              | 3                 | 4                 |
| E-cigarettes are less addictive than cigarettes                                        | 1              | 2              | 3                 | 4                 |
| E-cigarettes are not safe                                                              | 1              | 2              | 3                 | 4                 |
| More evidence is needed demonstrating the effectiveness of e-cigarettes for cessation  | 1              | 2              | 3                 | 4                 |
| I am very confident in my ability to answer questions about e-cigarettes from patients | 1              | 2              | 3                 | 4                 |

**12. Please indicate whether you have been informed about e-cigarettes from any of the following sources by circling “Yes” or “no” for each.**

|                                          | Yes | No |
|------------------------------------------|-----|----|
| Local live lectures (e.g., Grand rounds) | Yes | No |
| On-line programs (e.g., webinars)        | Yes | No |
| Conferences                              | Yes | No |
| Medical journals and other CME materials | Yes | No |
| Newspaper                                | Yes | No |
| TV News                                  | Yes | No |
| Radio News                               | Yes | No |
| Internet news feeds                      | Yes | No |
| Internet sites                           | Yes | No |
| Social media (Twitter, Facebook)         | Yes | No |
| E-cigarette advertisements               | Yes | No |

**13. What are the top three medical journals that you read regularly?**

- 1 \_\_\_\_\_
- 2 \_\_\_\_\_
- 3 \_\_\_\_\_

**14. How old are you? \_\_\_\_\_**

**15. What is your gender?**

- <sub>1</sub> Female
- <sub>2</sub> Male

**14. Which of the following best describes your race/ethnicity?**

- <sub>1</sub> White, Non-Hispanic
- <sub>2</sub> Black/African American, Non-Hispanic
- <sub>3</sub> Hispanic
- <sub>4</sub> Asian/Pacific Islander
- <sub>5</sub> South Asian
- <sub>6</sub> Other \_\_\_\_\_

**15. What year did you complete undergraduate medical education? \_\_\_\_\_**  
Year

**16. Did you complete your medical education in the United States?**

- <sub>1</sub> Yes
- <sub>2</sub> No

**17. What is your primary medical specialty?**

- <sub>1</sub> Cardiology
- <sub>2</sub> Family Medicine
- <sub>3</sub> Internal Medicine
- <sub>4</sub> Ob/Gyn
- <sub>5</sub> Oncology
- <sub>6</sub> Pulmonary

**18. What percent of your work time is spent providing direct patient care? \_\_\_\_\_ %**  
Percent

**19. Which of the following best describes your practice?**

- <sub>1</sub> Solo
- <sub>2</sub> Group- single specialty
- <sub>3</sub> Multispecialty
- <sub>4</sub> Employed by hospital or other healthcare organization
- <sub>5</sub> Employed by a Federal or State agency
- <sub>6</sub> Other \_\_\_\_\_

**20. Please check the response that best describes your experience with the Public Health Service Clinical Practice Guideline: Treating Tobacco Use and Dependence (2008).**

- <sub>1</sub> Have never heard of these guidelines
- <sub>2</sub> Have heard of these guidelines, but have not read them
- <sub>3</sub> Have read these guidelines, but have not used them
- <sub>4</sub> Have used these guidelines

**21. Have you smoked at least 100 cigarettes in your life?**

- <sub>1</sub> Yes
- <sub>2</sub> No

**22. Have you ever tried an e-cigarette?**

- <sub>1</sub> Yes
- <sub>2</sub> No

**23. Have you had any training in smoking cessation treatment?**

- <sub>1</sub> Yes
- <sub>2</sub> No

**24. Would you be interested in receiving training in smoking cessation treatment?**

- <sub>1</sub> Yes
- <sub>2</sub> No

**Thank you very much for your time.  
Please return your completed survey in the self-addressed  
stamped envelope.**

**If you misplaced the self-addressed stamped envelope, please return the survey to:**

**Rutgers School of Public Health  
683 Hoes Lane West, Room 306  
Piscataway, NJ 08854**

**Phone (732) 235-9183**
